# Supplementary material for: Anharmonic vibrations of N–H in Cl−(N-methylacetamide)1(H2O)0–2Ar2 cluster ions. Combined IRPD experiments and BOMD simulations
Source: Royal Society of Chemistry journal article supplement (doi:10.1039/c3cp52418c), 2013-01-01
Supplement: c3cp52418c.pdf [file c3cp52418c.pdf]

**Anharmonic vibrations from the Chloride•••Amide Ionic Hydrogen  
Bonds in  $\text{Cl}(\text{N-methylacetamide})_1(\text{H}_2\text{O})_{0-2}\text{Ar}_2$  Cluster Ions.  
Combined IRPD experiments and BOMD simulations.**

**Supplementary Information**

Jordan P. Beck<sup>1</sup>, Marie-Pierre Gaijeot<sup>2,3</sup>, and James M. Lisy<sup>4</sup>

<sup>1</sup> Concordia University Wisconsin, 12800 N. Lakeshore Drive, Mequon, Wisconsin 53097, USA

<sup>2</sup> Laboratoire Analyse et Modélisation pour la Biologie et l'Environnement, LAMBE UMR CNRS 8587, Université Evry val d'Essonne, 91025 Evry, France & Institut Universitaire de France IUF, 103 Blvd St Michel, 75005 Paris, France, Email: [mgaigeot@univ-evry.fr](mailto:mgaigeot@univ-evry.fr)

<sup>3</sup> Corresponding Author, Email: [mgaigeot@univ-evry.fr](mailto:mgaigeot@univ-evry.fr)

<sup>4</sup> Department of Chemistry, University of Illinois at Urbana-Champaign, Urbana, Illinois 61801, USA

---

<sup>1</sup> Concordia University Wisconsin, 12800 N. Lakeshore Drive, Mequon, Wisconsin 53097, USA

<sup>2</sup> Laboratoire Analyse et Modélisation pour la Biologie et l'Environnement, LAMBE UMR CNRS 8587, Université Evry val d'Essonne, 91025 Evry, France & Institut Universitaire de France IUF, 103 Blvd St Michel, 75005 Paris, France, Email: [mgaigeot@univ-evry.fr](mailto:mgaigeot@univ-evry.fr)

<sup>3</sup> Corresponding Author, Email: [mgaigeot@univ-evry.fr](mailto:mgaigeot@univ-evry.fr)

<sup>4</sup> Department of Chemistry, University of Illinois at Urbana-Champaign, Urbana, Illinois 61801, USA

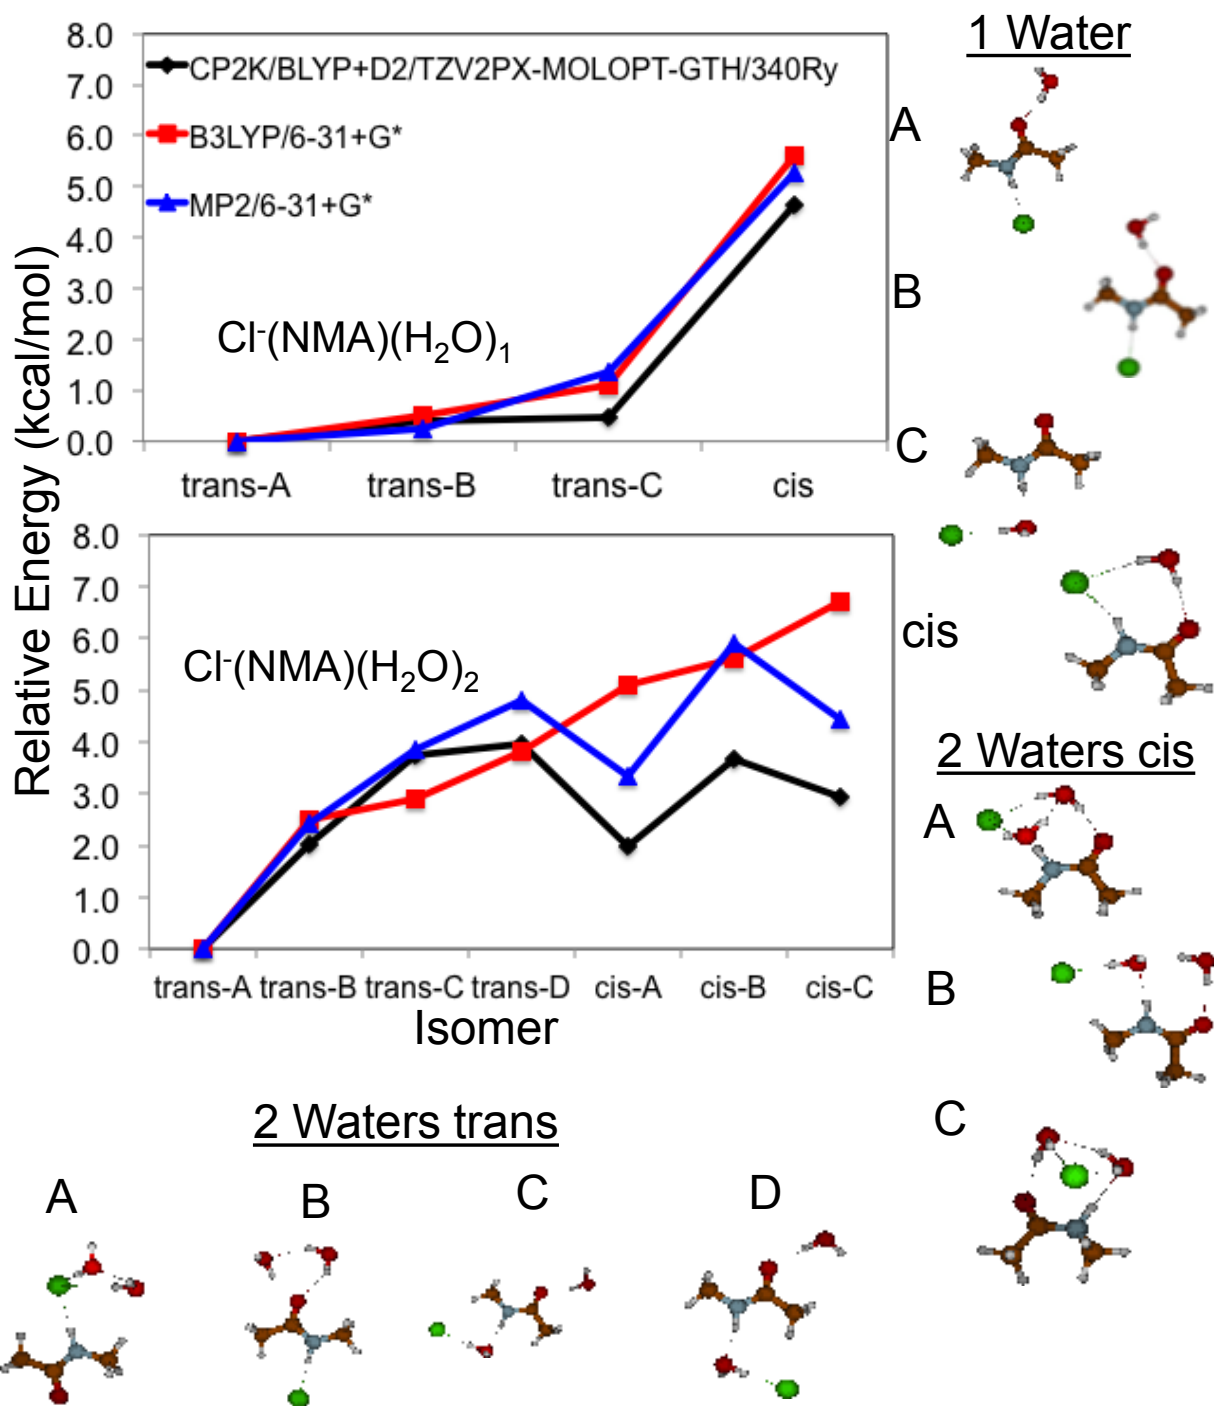

**SI Figure 1:** Relative energies of several isomers of Cl<sup>-</sup>(NMA)(H<sub>2</sub>O)<sub>n</sub> for n=1 (top panel) and n=2 (bottom) calculated with various approaches for comparison. The structures of all the isomers are also shown.

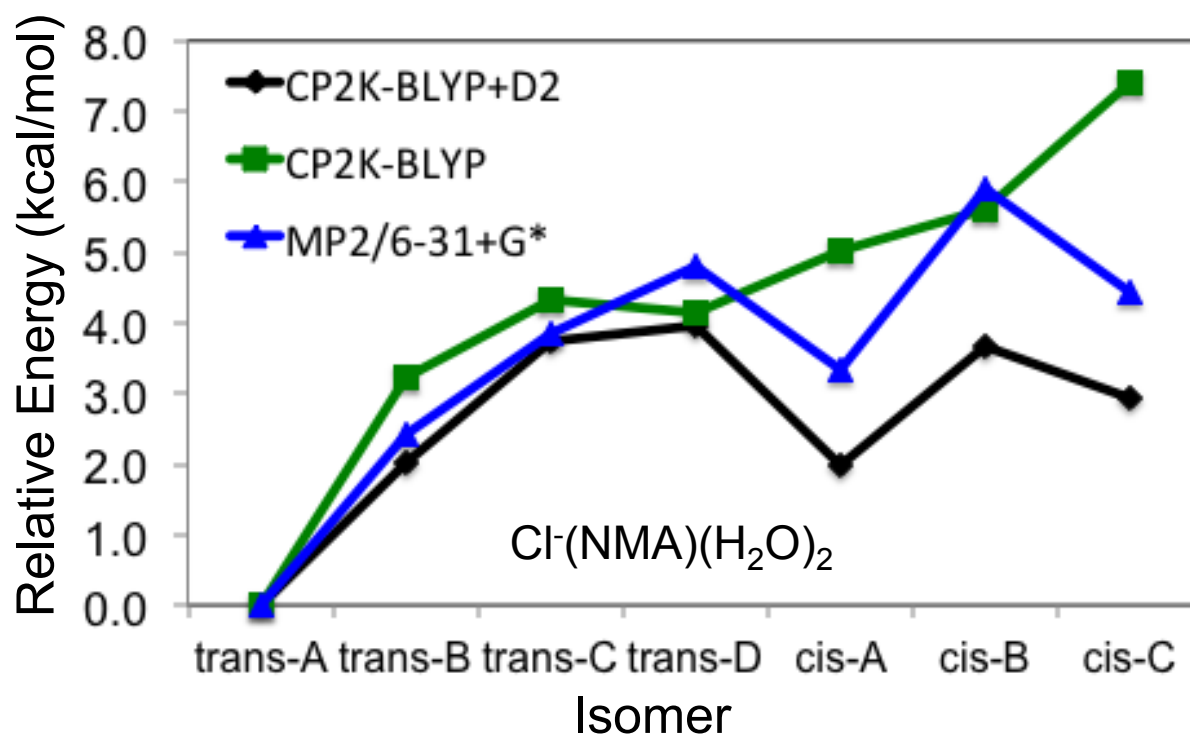

**SI Figure 2:** Comparison of the relative energies for Cl-(NMA)(H<sub>2</sub>O)<sub>2</sub> to show the impact of dispersion on the CP2K calculations. The calculations which include dispersion match the relative energies from the MP2 calculations more closely than the calculations not including dispersion.
